# Supplementary material
Source: Springer Nature journal article supplement (https://www.springermedizin.de/resource/supplementary/12879_2013_3071_MOESM2_ESM.pdf/9446902)

## Mazhuang Farmer Market

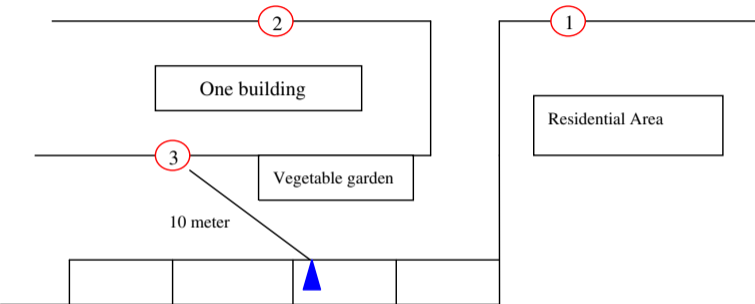

1. Living poultry slaughter site with a distance of 500 meter
2. Living poultry slaughter site with a distance of 1000 meter
3. Chicken coop with several chicken with a distance of 10 meter

 The patients' apartment

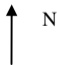

Supplement: MOESM2 [file 9446902]
